# Supplementary material
Source: PubMed Central journal article supplement (PMC3890825)
Supplement: 1306516111_pnas.201306516SI.pdf [file 1306516111_pnas.201306516SI.pdf]

# Supporting Information

Rudko et al. 10.1073/pnas.1306516111

**Table S1. Parameters derived from fitting the higher-order  $R_2^*$  model in external capsule white matter**

| ROI location    | $C_0, s^{-1}$    | $C_1, s^{-1}$   | $C_2, s^{-1}$    | $\psi_0, ^\circ$  | $r$   |
|-----------------|------------------|-----------------|------------------|-------------------|-------|
| Left brain, S1  | $59.90 \pm 0.11$ | $2.70 \pm 0.33$ | $0.88 \pm 0.32$  | $11.92 \pm 5.08$  | 0.825 |
| Right brain, S1 | $59.44 \pm 0.16$ | $1.52 \pm 0.34$ | $1.32 \pm 0.52$  | $6.56 \pm 3.09$   | 0.814 |
| Left brain, S2  | $64.45 \pm 0.28$ | $1.42 \pm 0.17$ | $-0.35 \pm 0.14$ | $13.10 \pm 5.45$  | 0.642 |
| Right brain, S2 | $64.69 \pm 0.23$ | $1.82 \pm 0.31$ | $-0.55 \pm 0.45$ | $22.64 \pm 8.30$  | 0.739 |
| Left brain, S3  | $63.02 \pm 0.15$ | $1.20 \pm 0.38$ | $0.51 \pm 0.33$  | $19.84 \pm 14.32$ | 0.885 |
| Right brain, S3 | $62.23 \pm 0.27$ | $1.18 \pm 0.33$ | $0.50 \pm 0.44$  | $11.50 \pm 13.03$ | 0.742 |

Data are shown for each of the three brain samples (e.g., S1 = brain sample 1). Pearson correlation coefficients ( $r$ ) are given in the right-most column of the table. ROI, region of interest;  $R_2^*$ , effective transverse relaxation rate;  $C_0$ , representing transverse relaxation rate constant;  $C_1$ , isotropic perturber fraction;  $C_2$ , anisotropic perturber fraction.
